# Supplementary material for: Spread of a Novel Indian Ocean Lineage Carrying E1-K211E/E2-V264A of Chikungunya Virus East/Central/South African Genotype across the Indian Subcontinent, Southeast Asia, and Eastern Africa
Source: MDPI journal article supplement (doi:10.3390/microorganisms10020354), 2022-02-03
Supplement: s1 [file s1]

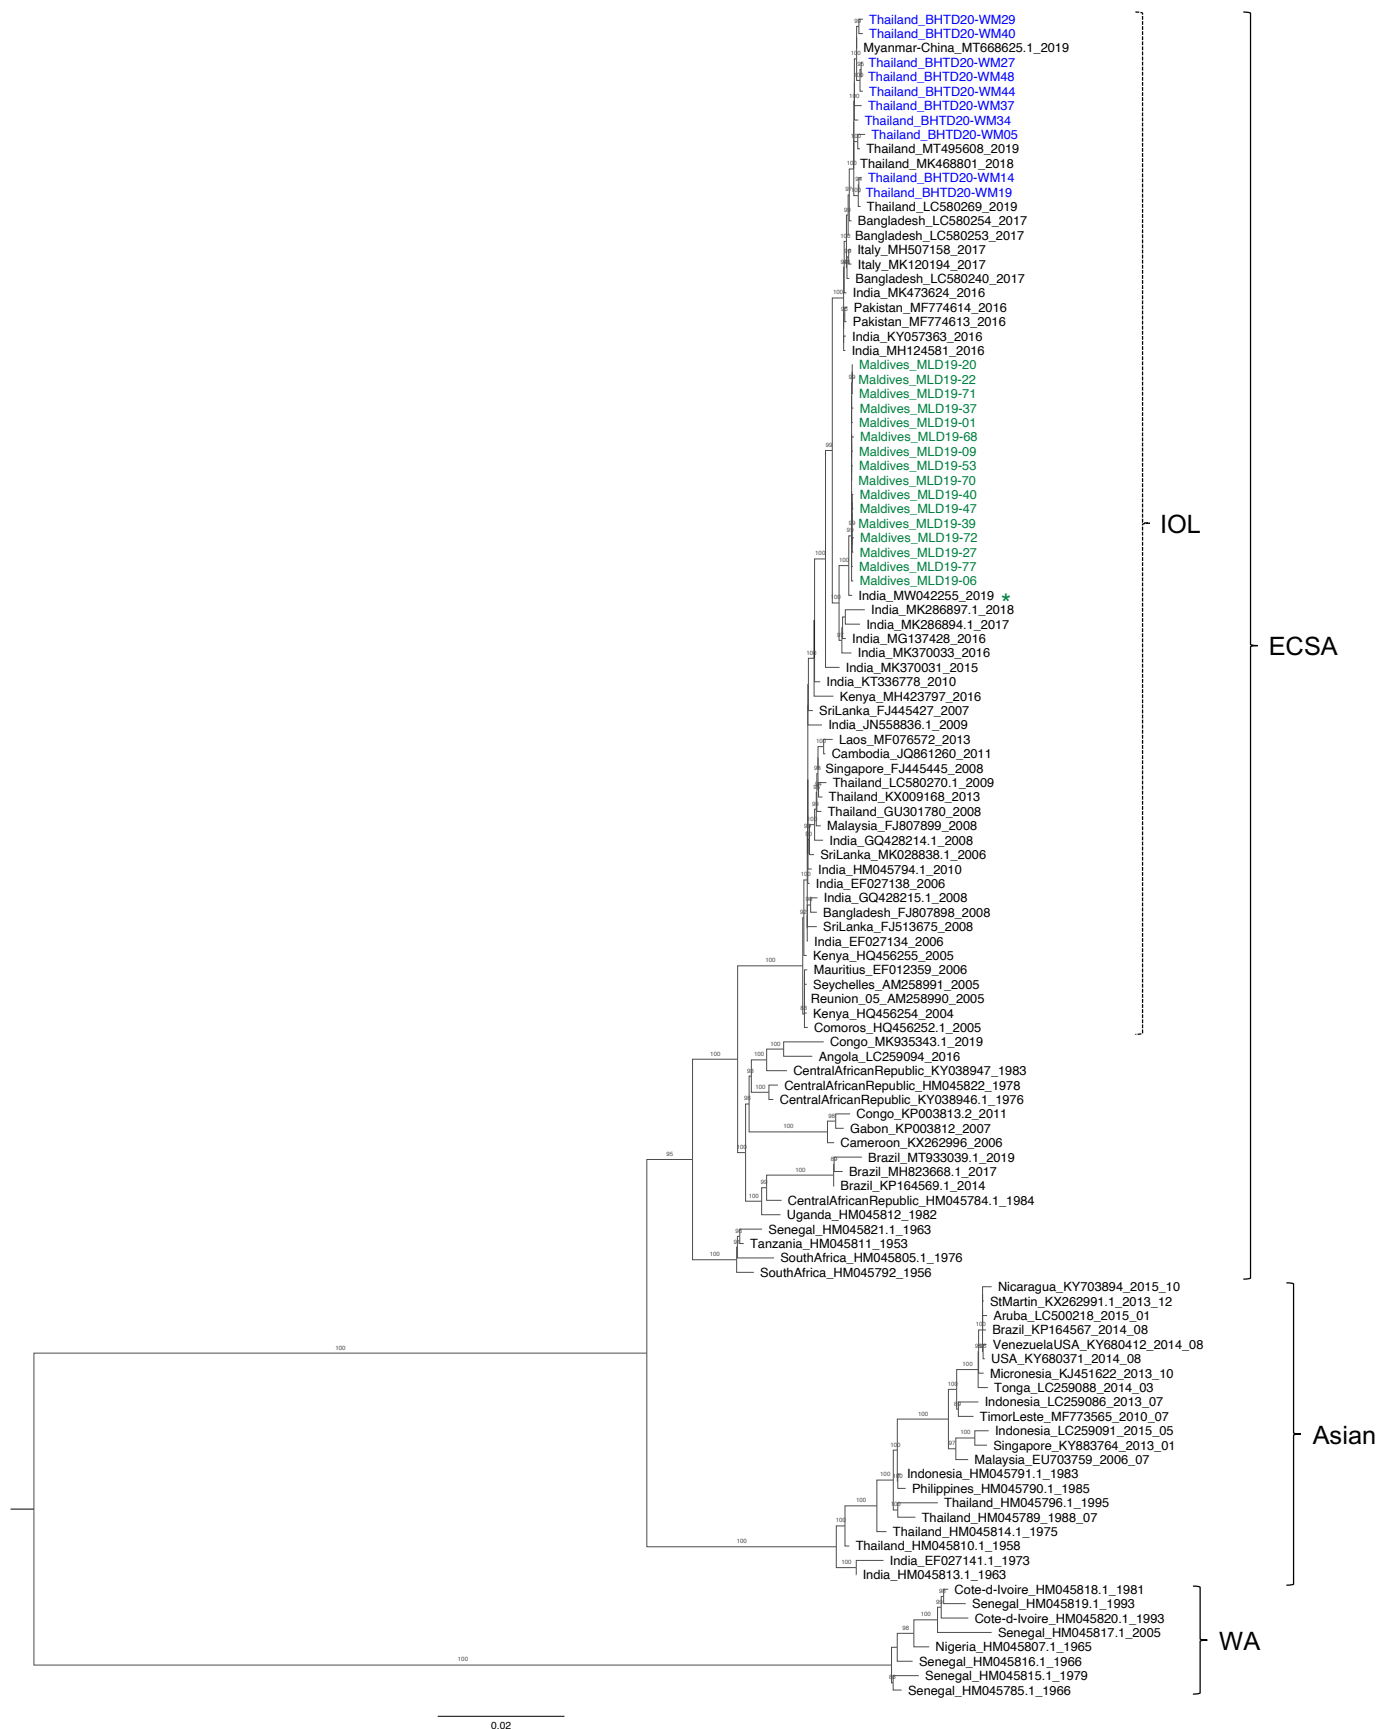

**Figure S1.** Genotype classification of CHIKVs obtained in the present study. The maximum-likelihood tree of open reading frames (ORFs) were constructed using GTR+F+I with 1000 ultrafast bootstrap replications. The Maldives and Thailand sequences obtained in the present study are labeled with green and blue, respectively. The CHIKV genotypes and a lineage, East/Central/South/African (ECSA), West African (WA), Asian, and Indian Ocean Lineage (IOL), are indicated to the right. Bootstrap support values exceeding 85% are shown adjacent to the branch.

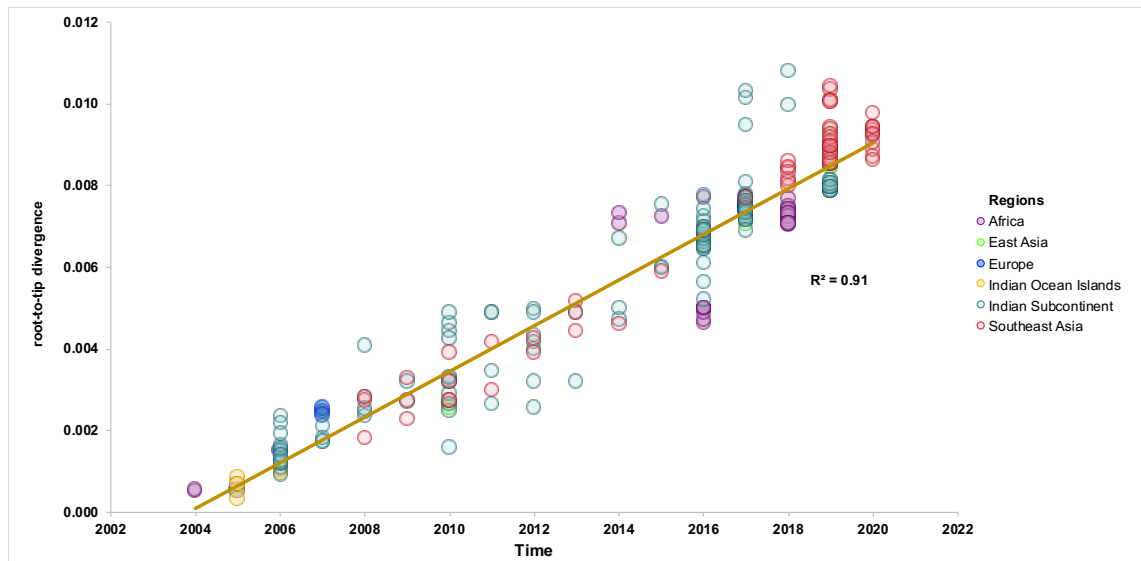

**Figure S2.** Root-to-tip divergence analysis of the dataset of 271 IOL CHIKV CDS sequences. The regression of root-to-tip divergence against date inferred in TempEst v1.5.3 is shown. The  $R^2 = 0.91$  is shown adjacent to the regression line. The x-intercept (tMRCA) was 2003.82. The slope (rate) was  $5.59 \times 10^{-4}$ . The date range was 16 years. The color marker represents the regions indicated on the right.

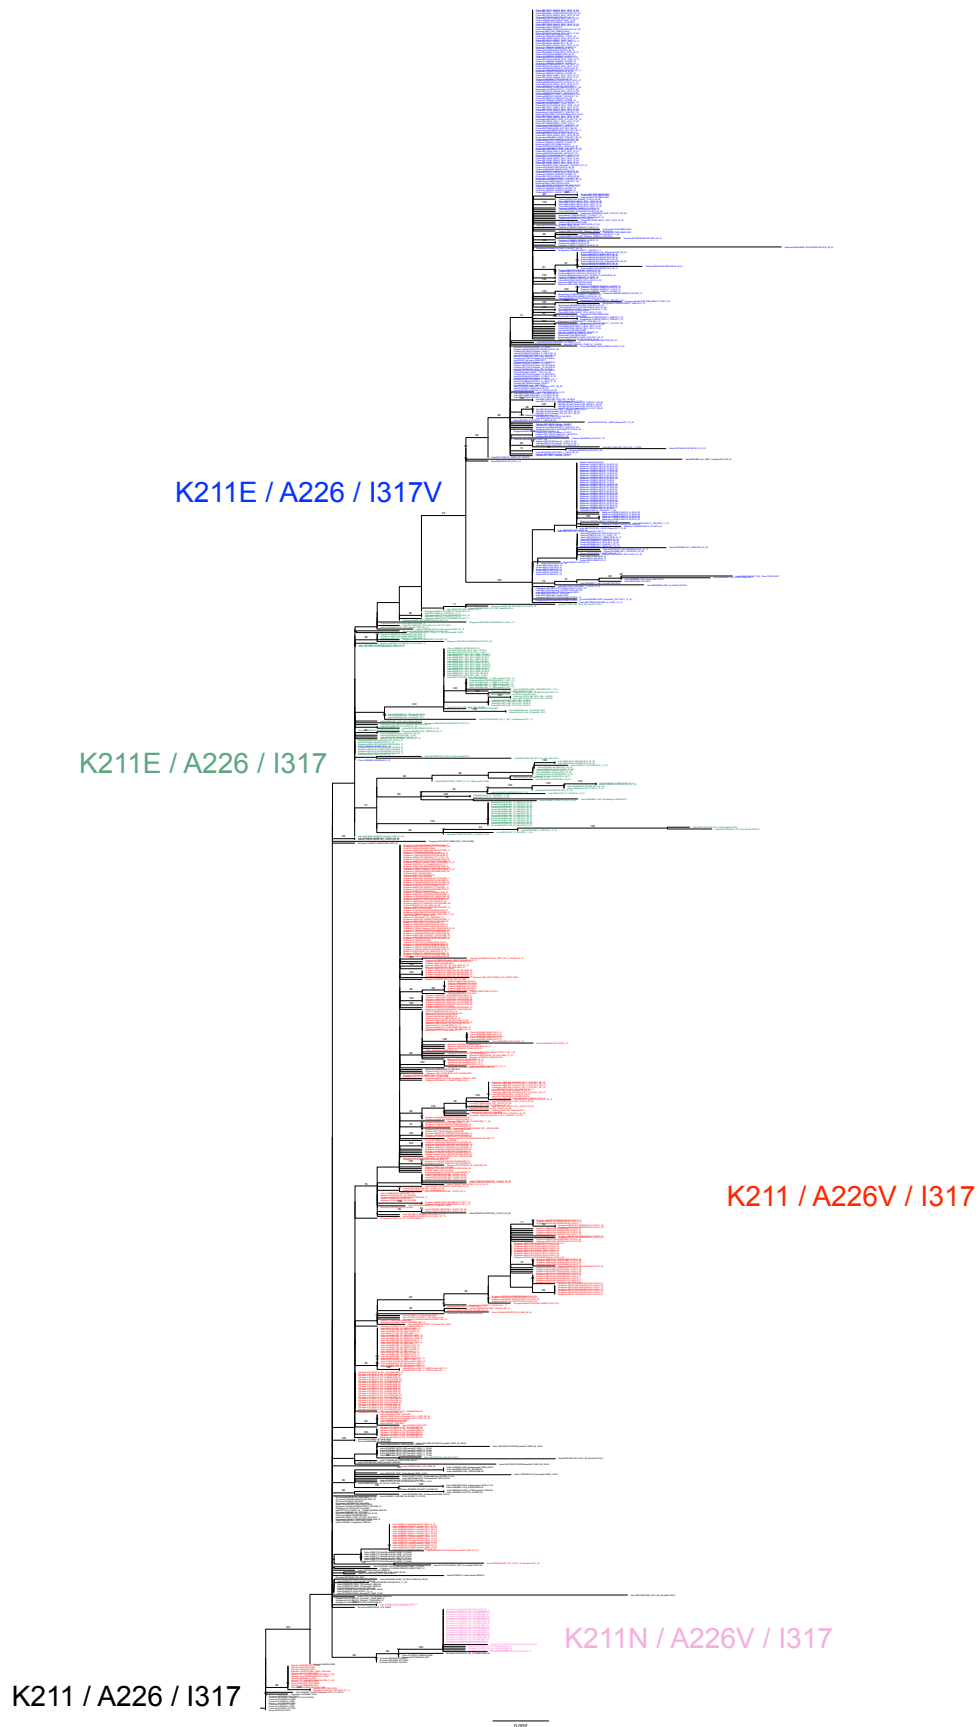

**Figure S3.** The Maximum Likelihood tree of 962 E1 sequences (1317 bp) of Indian Ocean Lineage (IOL) of CHIKV E1 constructed by IQ-TREE under TNe+G4. The combination of amino acid variations in E1 K211/A226/I317, K211N/A226V/I317, K211/A226V/I317, K211E/A226/I317, and K211E/A226/I317V correspond to the sequence color black, pink, red, green, and blue, respectively. The number adjacent to the branch indicates the support score of ultrafast bootstrap.
